# Supplementary material for: Layered copper compounds based on 4-(3-bromothienyl)phosphonate (BTP): weak ferromagnetism observed in [Cu2(4,4′-bpy)0.5(BTP)2]·H2O
Source: Royal Society of Chemistry journal article supplement (doi:10.1039/b907356f), 2009-01-01
Supplement: b907356f.pdf [file b907356f.pdf]

Electronic Supplementary Information (ESI) for  
**Layered copper compounds based on 4-(3-bromothieryl)phosphonate  
(BTP): weak ferromagnetism observed in  $[\text{Cu}_2(4,4'\text{-bpy})_{0.5}(\text{BTP})_2]\cdot\text{H}_2\text{O}$**

Li-Rong Guo, Feng Zhu, Yu Chen, Yi-Zhi Li and Li-Min Zheng\*

*State Key Laboratory of Coordination Chemistry, Coordination Chemistry Institute, School of Chemistry and Chemical Engineering, Nanjing University, Nanjing 210093, P. R. China*

\* Correspondence E-mail: lmzheng@netra.nju.edu.cn, Fax: +86-25-83314502.

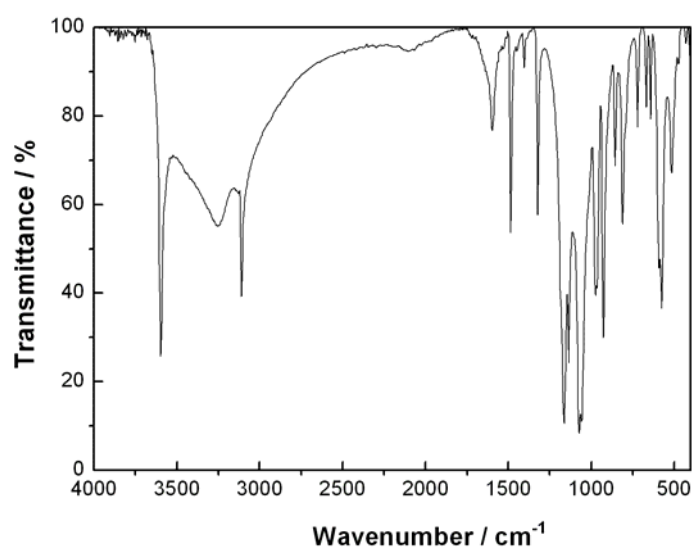

**Fig. S1** IR spectroscopy of compound 1.

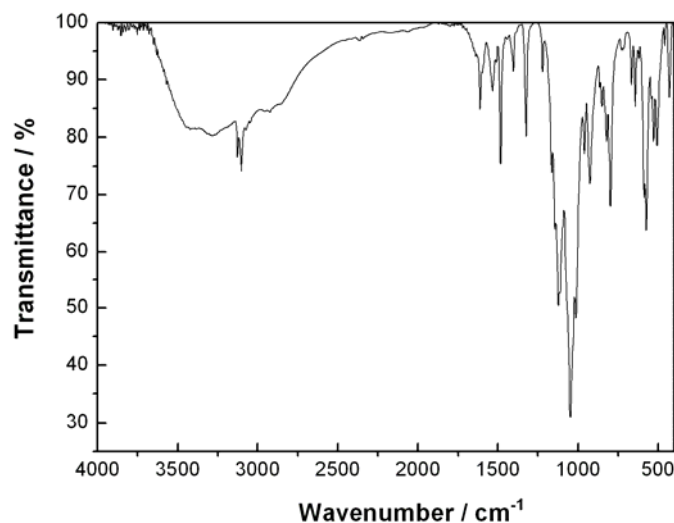

**Fig. S2** IR spectroscopy of compound 2.

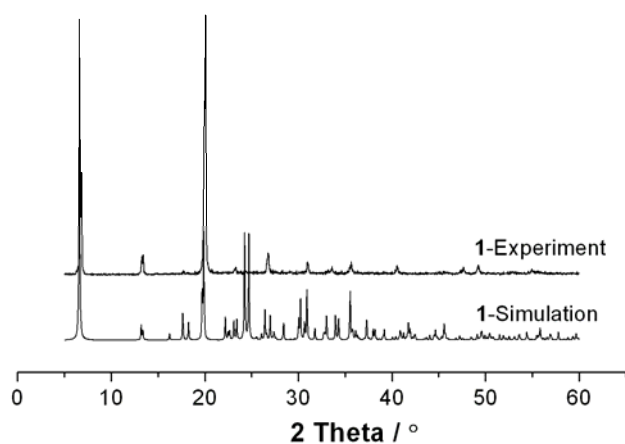

**Fig. S3** Powder XRD diffraction patterns for compound 1.

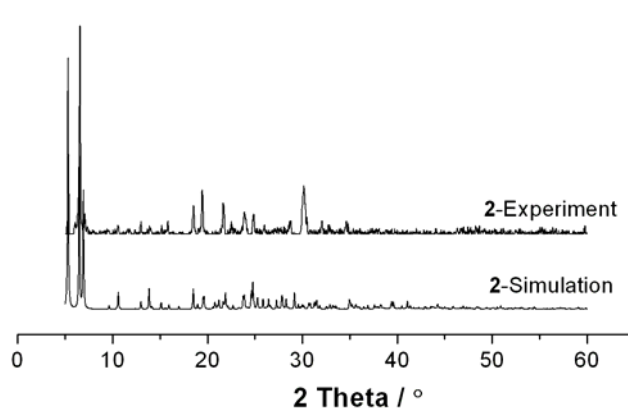

**Fig. S4** Powder XRD diffraction patterns for compound 2.

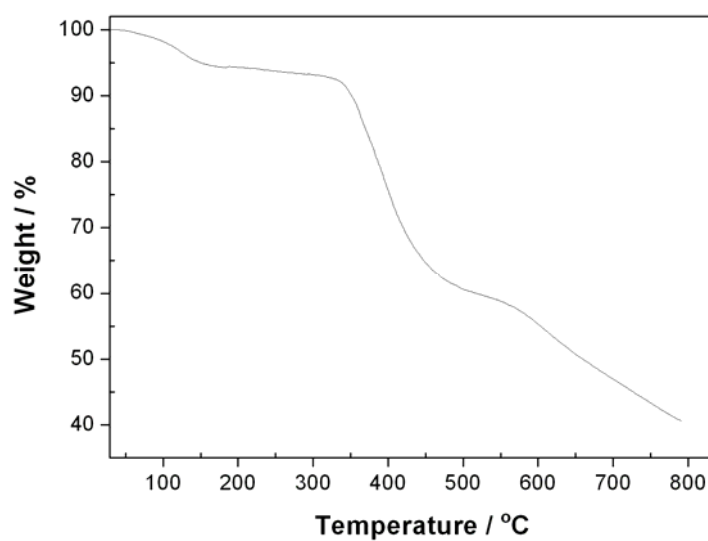

**Fig. S5** TGA curve of compound 1.

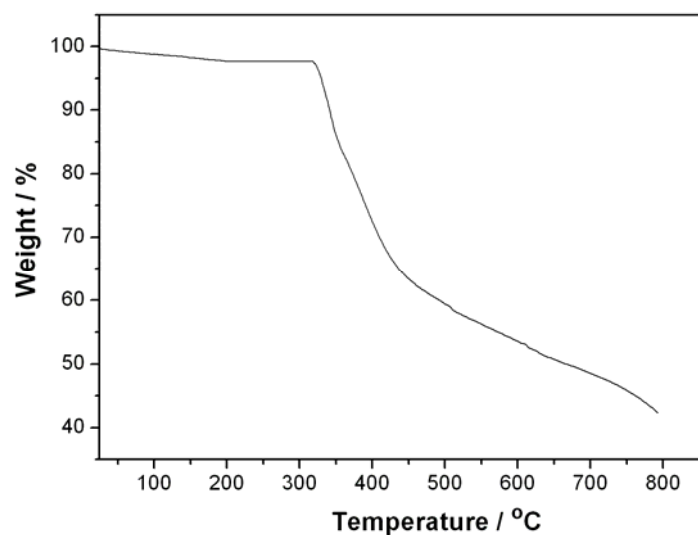

**Fig. S6** TGA curve of compound 2.

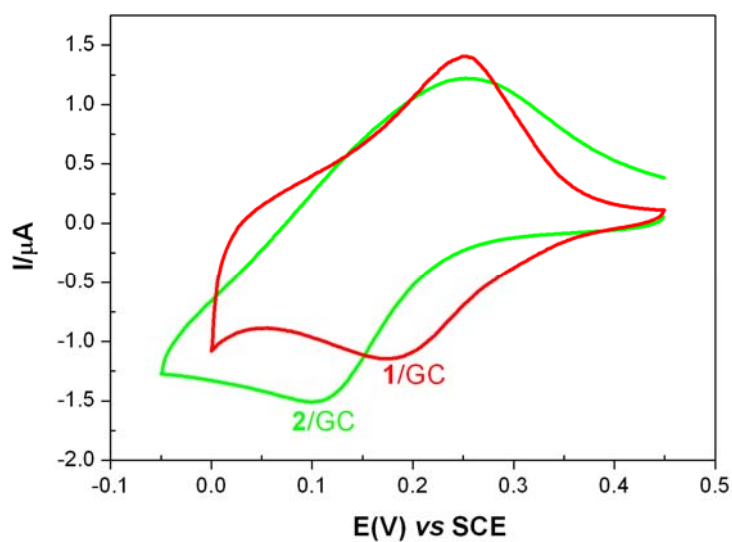

**Fig. S7** Cyclic voltammograms of 1/GC (red) and 2/GC (green) electrodes in 1.0 M KNO<sub>3</sub> solution at a scan rate of 100 mV/s.
